# Supplementary material for: Thermally controlling the singlet–triplet energy gap of a diradical in the solid state
Source: Royal Society of Chemistry journal article supplement (doi:10.1039/c6sc01825d), 2016-01-01
Supplement: c6sc01825d1.pdf [file c6sc01825d1.pdf]

## Supporting Information for

# Thermally Controlling the Singlet-Triplet Energy Gap of a Diradical in the Solid State

Yuanting Su, Xingyong Wang, Lei Wang, Zaichao Zhang, Xinping Wang,\* You Song\* and Philip P. Power\*

### Contents

|                                                                                                                                |     |
|--------------------------------------------------------------------------------------------------------------------------------|-----|
| Table S1. Crystal data and structure refinement.....                                                                           | S2  |
| Figure S1. Powder EPR spectra of $\mathbf{1}^{2+} \cdot 2[\text{Al}(\text{OR}_F)_4]^-$ at various temperatures (120-170K)..... | S3  |
| Figure S2. Powder EPR spectra of $\mathbf{1}^{2+} \cdot 2[\text{Al}(\text{OR}_F)_4]^-$ at various temperatures (190-290K)..... | S4  |
| Figure S3. Powder EPR spectrum of $\mathbf{1}^{2+} \cdot 2[\text{Al}(\text{OR}_F)_4]^-$ at 123 K.....                          | S5  |
| Figure S4. Powder EPR spectrum of $\mathbf{1}^{2+} \cdot 2[\text{Al}(\text{OR}_F)_4]^-$ at 200 K.....                          | S6  |
| Figure S5. Powder EPR spectrum of $\mathbf{1}^{2+} \cdot 2[\text{Al}(\text{OR}_F)_4]^-$ at 290 K.....                          | S7  |
| Figure S6. Packing diagram of $\mathbf{1}^{2+}$ at 200 K.....                                                                  | S8  |
| Figure S7. Packing diagram of $\mathbf{1}^{2+}$ at 123 K.....                                                                  | S9  |
| Coordinates for calculated geometries .....                                                                                    | S10 |

**Table S1.** Crystal data and structure refinement for  $1^{2+} \cdot 2[\text{Al}(\text{OR}_F)_4]^-$ 

|                                         | 123 K                                                                    | 200 K                                                                    |
|-----------------------------------------|--------------------------------------------------------------------------|--------------------------------------------------------------------------|
| formula                                 | $\text{C}_{78}\text{H}_{40}\text{Al}_2\text{F}_{72}\text{N}_2\text{O}_8$ | $\text{C}_{78}\text{H}_{40}\text{Al}_2\text{F}_{72}\text{N}_2\text{O}_8$ |
| <i>Mr</i> [g mol <sup>-1</sup> ]        | 2555.08                                                                  | 2555.08                                                                  |
| crystal system                          | Monoclinic                                                               | Monoclinic                                                               |
| space group                             | <i>P</i> 2(1)/ <i>c</i>                                                  | <i>P</i> 2(1)/ <i>c</i>                                                  |
| <i>Z</i>                                | 2                                                                        | 2                                                                        |
| Temp. (K)                               | 123(2)                                                                   | 200(2)                                                                   |
| $\mu$ (mm <sup>-1</sup> )               | 0.233                                                                    | 0.226                                                                    |
| <i>a</i> (Å)                            | 17.262(3)                                                                | 17.4037(17)                                                              |
| <i>b</i> (Å)                            | 13.956(2)                                                                | 14.1343(13)                                                              |
| <i>c</i> (Å)                            | 20.301(3)                                                                | 20.914(2)                                                                |
| $\alpha$ (°)                            |                                                                          |                                                                          |
| $\beta$ (°)                             | 109.105(3)                                                               | 111.7830(15)                                                             |
| $\gamma$ (°)                            |                                                                          |                                                                          |
| <i>V</i> [Å <sup>3</sup> ]              | 4621.4(13)                                                               | 4777.2(8)                                                                |
| <i>R</i> 1 ( <i>I</i> > 2σ( <i>I</i> )) | 0.0489                                                                   | 0.0905                                                                   |
| <i>wR</i> 2 (all data)                  | 0.1394                                                                   | 0.2169                                                                   |

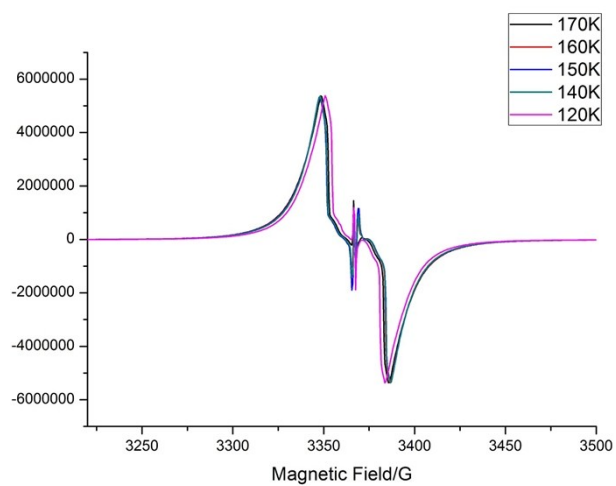

**Figure S1.** Powder EPR spectra of  $\text{I}^{2+}\cdot 2[\text{Al}(\text{OR}_F)_4]^-$  at various temperatures (120 – 170 K). The central peak shows the signal derived from the mono radical impurity.

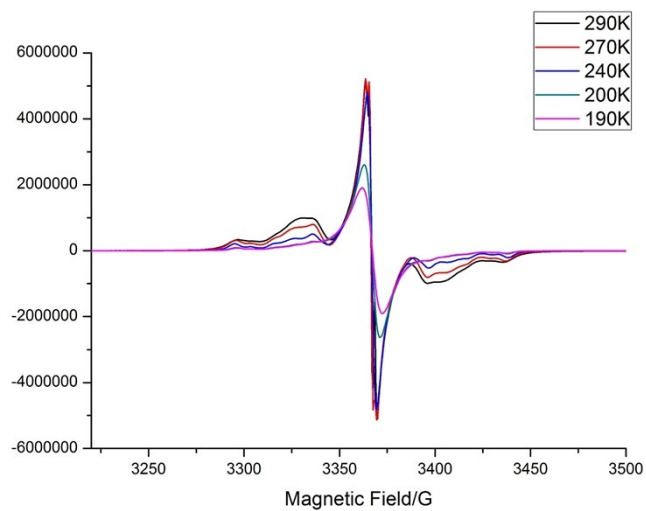

**Figure S2.** Powder EPR spectra of  $1^{2+} \cdot 2[Al(OR_F)_4]^-$  at various temperatures (190 – 290 K). The central peak shows the signal derived from the mono radical impurity.

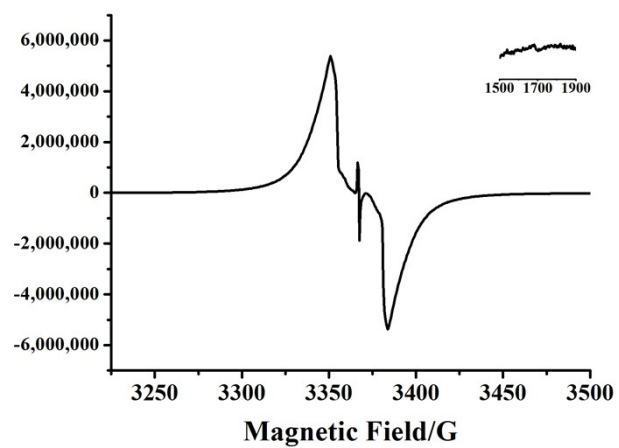

**Figure S3.** Powder EPR spectra of  $I^{2+}\cdot 2[Al(OR_F)_4]^-$  at 123K. The central peak shows the signal derived from the mono radical impurity.

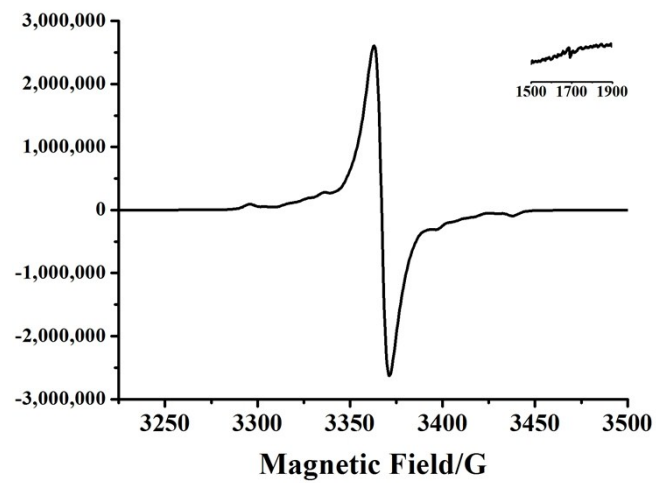

**Figure S4.** Powder EPR spectra of  $1^{2+} \cdot 2[Al(OR_F)_4]^-$  at 200K.

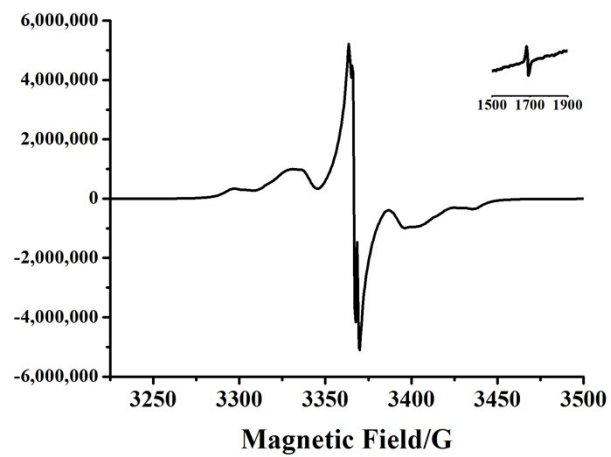

**Figure S5.** Powder EPR spectra of  $1^{2+} \cdot 2[Al(OR_F)_4]^-$  at 290K.

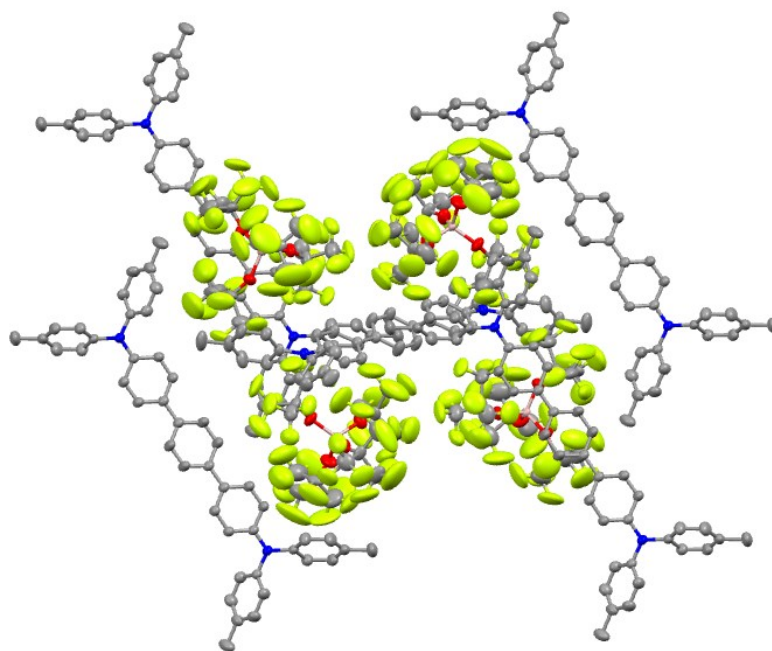

**Figure S6.** Packing diagram of  $1^{2+} \cdot 2[Al(OR_f)_4]^-$  at 200 K.



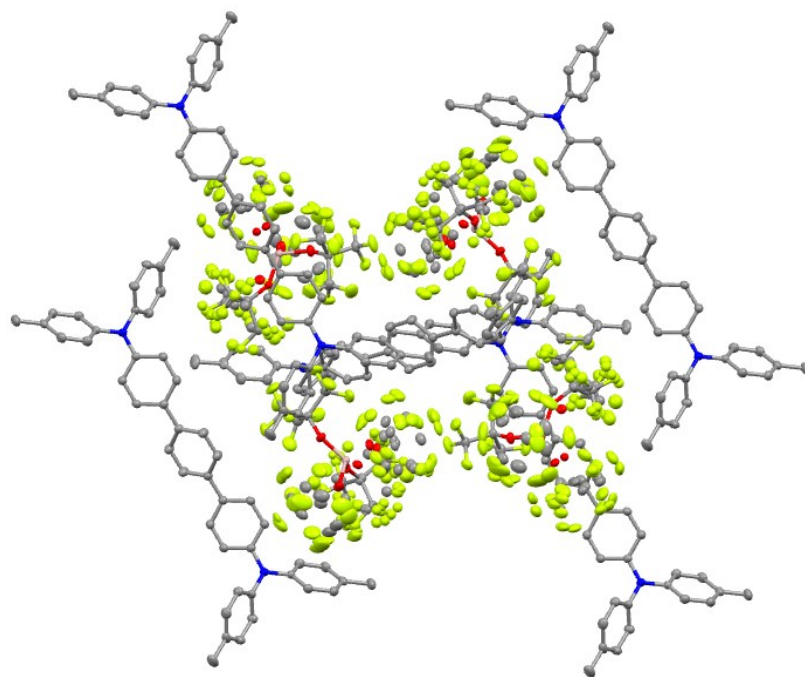

**Figure S7.** Packing diagram of  $1^{2+} \cdot 2[Al(OR_F)_4]^-$  at 123 K.

**Coordinates for calculated geometries:**

**I<sup>2+</sup>-CS**

|   |               |              |              |
|---|---------------|--------------|--------------|
| C | -1.437688000  | 0.000040000  | 0.000246000  |
| C | -0.688524000  | -0.834357000 | -0.874442000 |
| H | -1.199005000  | -1.457558000 | -1.599616000 |
| C | 0.688108000   | -0.834411000 | -0.874681000 |
| H | 1.198288000   | -1.457657000 | -1.600027000 |
| C | -5.742726000  | 0.000159000  | 0.000966000  |
| C | -5.012218000  | -1.071003000 | -0.583277000 |
| H | -5.545986000  | -1.887754000 | -1.054426000 |
| C | -3.637104000  | -1.055587000 | -0.592243000 |
| H | -3.123536000  | -1.890520000 | -1.054472000 |
| C | -2.888662000  | 0.000086000  | 0.000501000  |
| C | -3.636858000  | 1.055794000  | 0.593498000  |
| H | -3.123114000  | 1.890673000  | 1.055629000  |
| C | -5.011979000  | 1.071303000  | 0.584964000  |
| H | -5.545527000  | 1.888023000  | 1.056437000  |
| C | -7.857783000  | 1.221521000  | -0.002897000 |
| C | -8.977196000  | 1.370130000  | 0.836472000  |
| H | -9.258791000  | 0.567403000  | 1.509856000  |
| C | -9.692735000  | 2.558491000  | 0.822243000  |
| H | -10.543508000 | 2.672087000  | 1.488177000  |
| C | -9.333533000  | 3.621877000  | -0.027172000 |
| C | -8.216200000  | 3.451334000  | -0.863630000 |
| H | -7.929882000  | 4.251073000  | -1.540740000 |
| C | -7.482986000  | 2.272080000  | -0.859868000 |
| H | -6.643707000  | 2.146581000  | -1.536525000 |
| C | -10.142354000 | 4.890634000  | -0.058272000 |
| H | -11.022718000 | 4.769845000  | -0.703797000 |
| H | -9.562218000  | 5.730900000  | -0.449861000 |
| H | -10.509302000 | 5.155909000  | 0.938331000  |
| C | -7.857315000  | -1.221576000 | 0.006120000  |
| C | -7.482871000  | -2.270871000 | 0.864285000  |
| H | -6.645269000  | -2.143677000 | 1.542699000  |
| C | -8.218976000  | -3.448744000 | 0.872514000  |
| H | -7.936207000  | -4.245255000 | 1.554733000  |
| C | -9.335950000  | -3.620238000 | 0.036518000  |
| C | -9.698315000  | -2.555455000 | -0.810511000 |
| H | -10.555394000 | -2.665749000 | -1.469045000 |
| C | -8.980098000  | -1.369188000 | -0.829423000 |
| H | -9.265466000  | -0.564813000 | -1.499211000 |
| C | -10.119622000 | -4.905068000 | 0.034147000  |

|   |               |              |              |
|---|---------------|--------------|--------------|
| H | -9.880746000  | -5.501799000 | -0.856253000 |
| H | -11.197791000 | -4.714459000 | 0.010509000  |
| H | -9.896621000  | -5.516974000 | 0.912282000  |
| N | -7.125559000  | 0.000110000  | 0.001395000  |
| C | 1.437635000   | -0.000068000 | -0.000249000 |
| C | 0.688466000   | 0.834327000  | 0.874441000  |
| H | 1.198938000   | 1.457532000  | 1.599617000  |
| C | -0.688166000  | 0.834385000  | 0.874676000  |
| H | -1.198354000  | 1.457628000  | 1.600021000  |
| C | 5.742691000   | -0.000189000 | -0.000962000 |
| C | 5.012168000   | 1.070900000  | 0.583409000  |
| H | 5.545928000   | 1.887591000  | 1.054670000  |
| C | 3.637059000   | 1.055483000  | 0.592369000  |
| H | 3.123503000   | 1.890361000  | 1.054707000  |
| C | 2.888607000   | -0.000114000 | -0.000503000 |
| C | 3.636814000   | -1.055743000 | -0.593634000 |
| H | 3.123081000   | -1.890560000 | -1.055888000 |
| C | 5.011930000   | -1.071253000 | -0.585104000 |
| H | 5.545469000   | -1.887905000 | -1.056704000 |
| C | 7.857784000   | -1.221522000 | 0.002697000  |
| C | 8.977128000   | -1.369983000 | -0.836786000 |
| H | 9.258625000   | -0.567172000 | -1.510110000 |
| C | 9.692729000   | -2.558310000 | -0.822746000 |
| H | 10.543447000  | -2.671792000 | -1.488772000 |
| C | 9.333664000   | -3.621801000 | 0.026594000  |
| C | 8.216403000   | -3.451402000 | 0.863175000  |
| H | 7.930190000   | -4.251221000 | 1.540234000  |
| C | 7.483127000   | -2.272184000 | 0.859600000  |
| H | 6.643910000   | -2.146798000 | 1.536355000  |
| C | 10.142560000  | -4.890517000 | 0.057490000  |
| H | 11.023038000  | -4.769707000 | 0.702853000  |
| H | 9.562543000   | -5.730831000 | 0.449148000  |
| H | 10.509336000  | -5.155729000 | -0.939194000 |
| C | 7.857270000   | 1.221569000  | -0.005915000 |
| C | 7.482901000   | 2.270956000  | -0.863994000 |
| H | 6.645352000   | 2.143844000  | -1.542488000 |
| C | 8.219017000   | 3.448827000  | -0.872036000 |
| H | 7.936306000   | 4.245415000  | -1.554190000 |
| C | 9.335924000   | 3.620221000  | -0.035935000 |
| C | 9.698209000   | 2.555345000  | 0.811012000  |
| H | 10.555233000  | 2.665561000  | 1.469633000  |
| C | 8.979985000   | 1.369079000  | 0.829734000  |
| H | 9.265296000   | 0.564629000  | 1.499457000  |

|   |              |              |              |
|---|--------------|--------------|--------------|
| C | 10.119634000 | 4.905029000  | -0.033383000 |
| H | 9.881087000  | 5.501463000  | 0.857302000  |
| H | 11.197805000 | 4.714368000  | -0.010169000 |
| H | 9.896371000  | 5.517236000  | -0.911240000 |
| N | 7.125513000  | -0.000128000 | -0.001391000 |

**I<sup>2+</sup>-OS**

|   |               |              |              |
|---|---------------|--------------|--------------|
| N | -7.139505000  | -0.000015000 | 0.000071000  |
| C | -5.728082000  | -0.000057000 | 0.000101000  |
| C | -5.015373000  | -0.965918000 | -0.739989000 |
| H | -5.553813000  | -1.701651000 | -1.327085000 |
| C | -3.630282000  | -0.955057000 | -0.739414000 |
| H | -3.102735000  | -1.712493000 | -1.309643000 |
| C | -2.899674000  | -0.000074000 | 0.000093000  |
| C | -3.630266000  | 0.954908000  | 0.739616000  |
| H | -3.102707000  | 1.712341000  | 1.309838000  |
| C | -5.015357000  | 0.965787000  | 0.740197000  |
| H | -5.553782000  | 1.701534000  | 1.327287000  |
| C | -1.422886000  | -0.000062000 | 0.000066000  |
| C | -0.694069000  | 0.416631000  | 1.131192000  |
| H | -1.217845000  | 0.703872000  | 2.037584000  |
| C | 0.694107000   | 0.416656000  | 1.131160000  |
| H | 1.217914000   | 0.703915000  | 2.037530000  |
| C | -7.849238000  | -1.222946000 | 0.009221000  |
| C | -7.393599000  | -2.304376000 | 0.790634000  |
| H | -6.511254000  | -2.189507000 | 1.411160000  |
| C | -8.107385000  | -3.493203000 | 0.801473000  |
| H | -7.763201000  | -4.311567000 | 1.427287000  |
| C | -9.278914000  | -3.653990000 | 0.037896000  |
| C | -9.717625000  | -2.564229000 | -0.738994000 |
| H | -10.612688000 | -2.668092000 | -1.345792000 |
| C | -9.025143000  | -1.364026000 | -0.757389000 |
| H | -9.365233000  | -0.544453000 | -1.381184000 |
| C | -10.031268000 | -4.956469000 | 0.032898000  |
| H | -9.749847000  | -5.559265000 | -0.841251000 |
| H | -11.112314000 | -4.794659000 | -0.023558000 |
| H | -9.815082000  | -5.551326000 | 0.924642000  |
| C | -7.849130000  | 1.222983000  | -0.009181000 |
| C | -9.025079000  | 1.364234000  | 0.757411000  |
| H | -9.365247000  | 0.544729000  | 1.381254000  |

|   |               |              |              |
|---|---------------|--------------|--------------|
| C | -9.717383000  | 2.564479000  | 0.738949000  |
| H | -10.612427000 | 2.668503000  | 1.345763000  |
| C | -9.278521000  | 3.654188000  | -0.038052000 |
| C | -8.107007000  | 3.493257000  | -0.801493000 |
| H | -7.762651000  | 4.311565000  | -1.427267000 |
| C | -7.393341000  | 2.304296000  | -0.790583000 |
| H | -6.510956000  | 2.189337000  | -1.411035000 |
| C | -10.031297000 | 4.956428000  | -0.033240000 |
| H | -9.761608000  | 5.552879000  | 0.848894000  |
| H | -11.112943000 | 4.793643000  | 0.008398000  |
| H | -9.804371000  | 5.557711000  | -0.917914000 |
| N | 7.139507000   | 0.000004000  | -0.000063000 |
| C | 5.728085000   | 0.000018000  | -0.000066000 |
| C | 5.015374000   | 0.965873000  | 0.740030000  |
| H | 5.553813000   | 1.701615000  | 1.327115000  |
| C | 3.630283000   | 0.954998000  | 0.739470000  |
| H | 3.102736000   | 1.712433000  | 1.309700000  |
| C | 2.899676000   | 0.000008000  | -0.000030000 |
| C | 3.630269000   | -0.954964000 | -0.739563000 |
| H | 3.102712000   | -1.712397000 | -1.309787000 |
| C | 5.015361000   | -0.965829000 | -0.740159000 |
| H | 5.553786000   | -1.701565000 | -1.327263000 |
| C | 1.422888000   | -0.000010000 | 0.000002000  |
| C | 0.694071000   | -0.416704000 | -1.131123000 |
| H | 1.217848000   | -0.703943000 | -2.037516000 |
| C | -0.694105000  | -0.416729000 | -1.131092000 |
| H | -1.217911000  | -0.703986000 | -2.037463000 |
| C | 7.849207000   | 1.222955000  | -0.009232000 |
| C | 7.393516000   | 2.304367000  | -0.790637000 |
| H | 6.511160000   | 2.189468000  | -1.411141000 |
| C | 8.107264000   | 3.493217000  | -0.801494000 |
| H | 7.763039000   | 4.311569000  | -1.427302000 |
| C | 9.278803000   | 3.654045000  | -0.037943000 |
| C | 9.717565000   | 2.564301000  | 0.738944000  |
| H | 10.612635000  | 2.668195000  | 1.345725000  |
| C | 9.025121000   | 1.364076000  | 0.757357000  |
| H | 9.365248000   | 0.544517000  | 1.381151000  |
| C | 10.031124000  | 4.956543000  | -0.032966000 |
| H | 9.749880000   | 5.559236000  | 0.841310000  |
| H | 11.112186000  | 4.794750000  | 0.023243000  |
| H | 9.814737000   | 5.551489000  | -0.924601000 |
| C | 7.849164000   | -1.222977000 | 0.009173000  |
| C | 9.025086000   | -1.364203000 | -0.757465000 |

|   |              |              |              |
|---|--------------|--------------|--------------|
| H | 9.365207000  | -0.544696000 | -1.381331000 |
| C | 9.717425000  | -2.564429000 | -0.739020000 |
| H | 10.612446000 | -2.668434000 | -1.345870000 |
| C | 9.278625000  | -3.654143000 | 0.038009000  |
| C | 8.107137000  | -3.493236000 | 0.801497000  |
| H | 7.762831000  | -4.311547000 | 1.427294000  |
| C | 7.393438000  | -2.304295000 | 0.790604000  |
| H | 6.511078000  | -2.189355000 | 1.411095000  |
| C | 10.031432000 | -4.956364000 | 0.033178000  |
| H | 9.761657000  | -5.552866000 | -0.848895000 |
| H | 11.113070000 | -4.793556000 | -0.008591000 |
| H | 9.804620000  | -5.557608000 | 0.917907000  |

**I<sup>2+</sup>-T**

|   |              |              |              |
|---|--------------|--------------|--------------|
| C | 1.421322000  | -0.000345000 | -0.000337000 |
| C | 0.694314000  | 0.351226000  | -1.152967000 |
| H | 1.219475000  | 0.587993000  | -2.073207000 |
| C | -0.694940000 | 0.351642000  | -1.152573000 |
| H | -1.220535000 | 0.588763000  | -2.072479000 |
| C | 5.726359000  | -0.000664000 | -0.000702000 |
| C | 5.015538000  | 0.945106000  | -0.765814000 |
| H | 5.554653000  | 1.665399000  | -1.371392000 |
| C | 3.629477000  | 0.935043000  | -0.764171000 |
| H | 3.100734000  | 1.677231000  | -1.353287000 |
| C | 2.900509000  | -0.000611000 | -0.000656000 |
| C | 3.629474000  | -0.936418000 | 0.762680000  |
| H | 3.100737000  | -1.678561000 | 1.351857000  |
| C | 5.015532000  | -0.946544000 | 0.764298000  |
| H | 5.554597000  | -1.666772000 | 1.370008000  |
| C | 7.848803000  | -1.222672000 | -0.004199000 |
| C | 9.028178000  | -1.360541000 | 0.758014000  |
| H | 9.371055000  | -0.538073000 | 1.376403000  |
| C | 9.715094000  | -2.564278000 | 0.750339000  |
| H | 10.608546000 | -2.667538000 | 1.359381000  |
| C | 9.269982000  | -3.659331000 | -0.014757000 |
| C | 8.091135000  | -3.504144000 | -0.769455000 |
| H | 7.735570000  | -4.331228000 | -1.377301000 |
| C | 7.382936000  | -2.312723000 | -0.768891000 |
| H | 6.493154000  | -2.203909000 | -1.379690000 |
| C | 10.044870000 | -4.948072000 | -0.044558000 |

|   |               |              |              |
|---|---------------|--------------|--------------|
| H | 10.799863000  | -4.922140000 | -0.842232000 |
| H | 9.394822000   | -5.805722000 | -0.240848000 |
| H | 10.575218000  | -5.120296000 | 0.896708000  |
| C | 7.847261000   | 1.223299000  | 0.005673000  |
| C | 7.380410000   | 2.310953000  | 0.772734000  |
| H | 6.491900000   | 2.199107000  | 1.384839000  |
| C | 8.091007000   | 3.501232000  | 0.781059000  |
| H | 7.738291000   | 4.323965000  | 1.396341000  |
| C | 9.270298000   | 3.658866000  | 0.028124000  |
| C | 9.719544000   | 2.564000000  | -0.735371000 |
| H | 10.620004000  | 2.665517000  | -1.334476000 |
| C | 9.030415000   | 1.361893000  | -0.750876000 |
| H | 9.378214000   | 0.538799000  | -1.365646000 |
| C | 10.017669000  | 4.964022000  | 0.019823000  |
| H | 9.712142000   | 5.575701000  | -0.840059000 |
| H | 11.097559000  | 4.807822000  | -0.064076000 |
| H | 9.819690000   | 5.548154000  | 0.922979000  |
| N | 7.140927000   | -0.000154000 | -0.000079000 |
| C | -1.421470000  | 0.000380000  | 0.000440000  |
| C | -0.694497000  | -0.351253000 | 1.153056000  |
| H | -1.219713000  | -0.588121000 | 2.073244000  |
| C | 0.694757000   | -0.351549000 | 1.152690000  |
| H | 1.220297000   | -0.588573000 | 2.072646000  |
| C | -5.726405000  | 0.000666000  | 0.000804000  |
| C | -5.015639000  | -0.946484000 | 0.764218000  |
| H | -5.554793000  | -1.667894000 | 1.368435000  |
| C | -3.629562000  | -0.936347000 | 0.762677000  |
| H | -3.100736000  | -1.679504000 | 1.350501000  |
| C | -2.900667000  | 0.000642000  | 0.000766000  |
| C | -3.629576000  | 0.937780000  | -0.760956000 |
| H | -3.100767000  | 1.680897000  | -1.348845000 |
| C | -5.015651000  | 0.947955000  | -0.762475000 |
| H | -5.554768000  | 1.669288000  | -1.366827000 |
| C | -7.848832000  | 1.222634000  | 0.007768000  |
| C | -9.028376000  | 1.362738000  | -0.753789000 |
| H | -9.371448000  | 0.542036000  | -1.374414000 |
| C | -9.715190000  | 2.566502000  | -0.742586000 |
| H | -10.608767000 | 2.671546000  | -1.351138000 |
| C | -9.269801000  | 3.659382000  | 0.025458000  |
| C | -8.090772000  | 3.501997000  | 0.779420000  |
| H | -7.734982000  | 4.327362000  | 1.389466000  |
| C | -7.382675000  | 2.310528000  | 0.775363000  |
| H | -6.492751000  | 2.199949000  | 1.385635000  |

|   |               |              |              |
|---|---------------|--------------|--------------|
| C | -10.044569000 | 4.948100000  | 0.059021000  |
| H | -10.799421000 | 4.920002000  | 0.856756000  |
| H | -9.394413000  | 5.805141000  | 0.257593000  |
| H | -10.575079000 | 5.123008000  | -0.881660000 |
| C | -7.847217000  | -1.223363000 | -0.009281000 |
| C | -7.379854000  | -2.308782000 | -0.779033000 |
| H | -6.491058000  | -2.195187000 | -1.390395000 |
| C | -8.090262000  | -3.499270000 | -0.790904000 |
| H | -7.737019000  | -4.320279000 | -1.408146000 |
| C | -9.269813000  | -3.659125000 | -0.039122000 |
| C | -9.719590000  | -2.566352000 | 0.727341000  |
| H | -10.620223000 | -2.669743000 | 1.325903000  |
| C | -9.030755000  | -1.364271000 | 0.746450000  |
| H | -9.378858000  | -0.542947000 | 1.363412000  |
| C | -10.018127000 | -4.963759000 | -0.034823000 |
| H | -9.738513000  | -5.563880000 | 0.841798000  |
| H | -11.099905000 | -4.805346000 | 0.016520000  |
| H | -9.795847000  | -5.559841000 | -0.924270000 |
| N | -7.141040000  | 0.000116000  | 0.000139000  |
